# Supplementary material
Source: Springer Nature journal article supplement (https://www.springermedizin.de/resource/supplementary/12885_2012_3905_MOESM3_ESM.pdf/9464704)
Supplement: MOESM3 [file 9464704]

**A**

MDA-MB-231

Ctr OSU Lap Combo

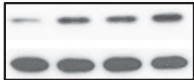p-eIF2 $\alpha$  (S51)Total eIF2 $\alpha$ **B**

BT474

Ctr OSU Lap Combo

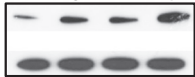p-eIF2 $\alpha$  (S51)Total eIF2 $\alpha$
